# Supplementary material for: Multi-Level Prioritization Analysis of Water Governance Components to Improve Agricultural Water-Saving Policy: A Case Study from Korea
Source: MDPI journal article supplement (doi:10.3390/su14063248), 2022-03-10
Supplement: s1 [file s1]

## Supplementary Material for Multi-level prioritization analysis of water governance components to improve agricultural water saving policy: A case study from Korea

**Table S1.** Saaty's numerical scale of importance for pairwise comparisons in AHP.

| Scale                               | Numerical rating         | Explanation                                                                                                                                                                                                            |
|-------------------------------------|--------------------------|------------------------------------------------------------------------------------------------------------------------------------------------------------------------------------------------------------------------|
| Extremely                           | 9                        | The evidence of favoring one criterion over another is of the highest degree possible of an affirmation                                                                                                                |
| Very strongly                       | 7                        | A criterion is strongly favored over another and its dominance is showed in practice                                                                                                                                   |
| Strongly                            | 5                        | Experience and judgment strongly or essentially favor one criterion over another                                                                                                                                       |
| Moderately                          | 3                        | Experience and judgment slightly-to-moderately favor one criterion over another                                                                                                                                        |
| Equally                             | 1                        | Two criteria contribute equally to the objective                                                                                                                                                                       |
| Intermediate values                 | 2,4,6,8                  | Used to represent compromises between the preferences in weights 1, 3, 5, 7, and 9                                                                                                                                     |
| Reciprocals of above nonzero values | 1/any of the scale value | If criteria i has one of the above nonzero numbers assigned to it when compared with criteria j, then j has the reciprocal value when compared with I and the degree of preferences will change according to the value |

**Table S2.** Sociodemographic characteristics of the expert stakeholders

| Items                                                   | Classification                    | Number | Distribution (%) |
|---------------------------------------------------------|-----------------------------------|--------|------------------|
| Sex                                                     | Male                              | 19     | 100              |
| Occupation                                              | Korea Rural Community Corporation | 5      | 26               |
|                                                         | Government employee               | 2      | 11               |
|                                                         | Professor                         | 5      | 26               |
|                                                         | Private agency                    | 4      | 21               |
|                                                         | Core actors                       | 3      | 16               |
| Experience related to agricultural water and rural area | Less than 5yr.                    | 1      | 5                |
|                                                         | 5~10yr.                           | 3      | 16               |
|                                                         | 11~15yr.                          | 3      | 16               |
|                                                         | 16~20yr.                          | 1      | 5                |
|                                                         | 20yr. and over                    | 9      | 47               |
|                                                         | None                              | 2      | 11               |
| Experience related to governance                        | Less than 5yr.                    | 4      | 21               |
|                                                         | 5~10yr.                           | 7      | 37               |
|                                                         | 11~15yr.                          | 3      | 16               |
|                                                         | 16~20yr.                          | 1      | 5                |
|                                                         | 20yr. and over                    | 2      | 10               |
|                                                         | None                              | 2      | 11               |

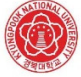

진리를 닦아 세계로, 꿈을 닦아 미래로!

## 경 북 대 학 교

수신자 마을연구소 일소공동 협동조합(구자인 소장)

(참 조)

제 목 설문조사지 내용 자문 요청

1. 귀 학과의 무궁한 발전을 기원합니다.
2. 박사학위 연구를 위한 자문을 아래와 같이 요청하오니 '농업용수 거버넌스' 구성요인 AHP설문조사지(첨부1)를 보시고, 자문의견서(첨부2)를 작성해주시기를 부탁드립니다.

- 아 래 -

가. 자문기간 : 2021. 6. 22 ~ 2021. 6. 29

나. 자문내용 : 박사학위 연구를 위한 AHP설문조사지에 대한 자문

다. 연 구 자 : 경북대학교 농업토목공학과 박사과정 이슬기(leesg91@knu.ac.kr)

첨부 1. AHP설문조사지 1부.

2. 자문의견서 1부.

끝.

경 북 대 학 교 농 업 토 목 공 학 전 공 주 임

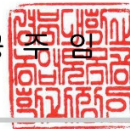

담당 김 상 철 전공주임 신 용 철

협조자

시행 농업토목공학전공-1908 ( 2021.06.22. ) 접수 ( )  
우 702-701 대구광역시 북구 대학로 80 / <http://www.knu.ac.kr>  
전화 (053)950-5730 /전송 (053)950-6752 / 공개

**Figure S1.** A sample of ethic approval to conduct the study
